# Supplementary material
Source: PubMed Central journal article supplement (PMC4270833)
Supplement: NIHMS614088-supplement-01.pdf [file NIHMS614088-supplement-01.pdf]

# CONFLICT OF INTEREST STATEMENT

## *The Journal of Arthroplasty*

(Adopted from the American Academy of Orthopaedic Surgeons disclosure statement)

The following form **must be filled out completely and submitted by each author (example, 6 authors, 6 forms)**. **If no discloser is required, please write/type "none" at the end of each sentence.**

### Cup Position Alone Does Not Predict Risk of Dislocation after Hip Arthroplasty

Manuscript Title

1. Royalties from a company or supplier (The following conflicts were disclosed)  
*none*
2. Speakers bureau/paid presentations for a company or supplier (The following conflicts were disclosed)  
*none*
- 3A. Paid employee for a company or supplier (The following conflicts were disclosed)  
*none*
- 3B. Paid consultant for a company or supplier (The following conflicts were disclosed)  
*none*
- 3C. Unpaid consultants for a company or supplier (The following conflicts were disclosed)  
*none*
4. Stock or stock options in a company or supplier (The following conflicts were disclosed)  
*none*
5. Research support from a company or supplier as a Principal Investigator (The following conflicts were disclosed)  
*none*
6. Other financial or material support from a company or supplier (The following conflicts were disclosed)  
*none*
7. Royalties, financial or material support from publishers (The following conflicts were disclosed)
8. Medical/Orthopaedic publications editorial/governing board (The following conflicts were disclosed)  
*AJO, HSS Journal, RALPH BOARDS*
9. Board member/committee appointments for a society (The following conflicts were disclosed)  
*SAKOS SCIENTIFIC COMMITTEE.*

### Each author must sign AND print or type his/her name, date and submit a separate form

In addition, one BLINDED Conflict of Interest form (no author names used) should be submitted per manuscript with all author disclosures.

*Stephen Lyman*

Author Name (Print or Type)



Author Signature

*6/1/11*

Date

# CONFLICT OF INTEREST STATEMENT

## *The Journal of Arthroplasty*

(Adopted from the American Academy of Orthopaedic Surgeons disclosure statement)

The following form **must be filled out completely and submitted by each author (example, 6 authors, 6 forms)**. **If no discloser is required, please write/type "none" at the end of each sentence.**

### Cup Position Alone Does Not Predict Risk of Dislocation after Hip Arthroplasty

Manuscript Title

1. Royalties from a company or supplier (The following conflicts were disclosed)  
*None*
2. Speakers bureau/paid presentations for a company or supplier (The following conflicts were disclosed)  
*none*
- 3A. Paid employee for a company or supplier (The following conflicts were disclosed)  
*none*
- 3B. Paid consultant for a company or supplier (The following conflicts were disclosed)  
*none*
- 3C. Unpaid consultants for a company or supplier (The following conflicts were disclosed)  
*none*
4. Stock or stock options in a company or supplier (The following conflicts were disclosed)  
*none*
5. Research support from a company or supplier as a Principal Investigator (The following conflicts were disclosed)  
*none*
6. Other financial or material support from a company or supplier (The following conflicts were disclosed)  
*none*
7. Royalties, financial or material support from publishers (The following conflicts were disclosed)  
*none*
8. Medical/Orthopaedic publications editorial/governing board (The following conflicts were disclosed)  
*none*
9. Board member/committee appointments for a society (The following conflicts were disclosed)  
*none*

### **Each author must sign AND print or type his/her name, date and submit a separate form**

In addition, one BLINDED Conflict of Interest form (no author names used) should be submitted per manuscript with all author disclosures.

*Yuo-yu Lee*  
Author Name (Print or Type)

*Yuo-yu Lee*  
Author Signature

*06/06/2014*  
Date
